# Supplementary material for: Celldetective: an AI-enhanced image analysis tool for unraveling dynamic cell interactions
Source: eLife journal article supplement (doi:10.7554/elife.105302), 2025-03-11
Supplement: supp1 [file elife-105302-supp1-v1.pdf]

## Supplementary Tables

**Table S1 Generalist deep learning segmentation models.** This table lists the different generalist models (Cellpose or StarDist) which can be called natively in CellDetective. The sample images are cropped to (200 × 200) px and rescaled homogeneously to fit in the table.

| name              | modalities              | # channels | dataset                                              | sample image                                                                          |
|-------------------|-------------------------|------------|------------------------------------------------------|---------------------------------------------------------------------------------------|
| CP_cyto3          | cytoplasm<br>nucleus    | 2          | Cellpose [38] &<br>user-submitted<br>images          | 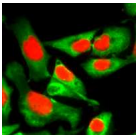   |
| CP_livecell       | cytoplasm (BF)<br>black | 2          | LiveCell [40]                                        |    |
| CP_tissuenet      | cytoplasm<br>nucleus    | 2          | TissueNet [39]                                       | /                                                                                     |
| CP_nuclei         | nucleus<br>black        | 2          | DSB 2018 [78],<br>Kaggle, ISBI 2009,<br>MoNuSeg [79] | /                                                                                     |
| SD_versatile_fluo | nucleus                 | 1          | subset of<br>DSB 2018 [78]                           |   |
| SD_versatile_he   | H&E RGB                 | 1          | MonoNuSeg 2018 [79],<br>TNBC 2018 [80]               |  |

**Table S2 MCF7 nuclei segmentation models in the presence of primary NK cells.** Each model was trained on the same dataset of ADCC images, picking only the relevant channels.

| Name                       | Channels                             | Type     | Pretrained        | Spatial calib.<br>( $\mu\text{m}$ ) | sample image                                                                        |
|----------------------------|--------------------------------------|----------|-------------------|-------------------------------------|-------------------------------------------------------------------------------------|
| mcf7_nuc_multimodal        | Hoechst<br>Brightfield<br>CFSE<br>PI | StarDist | None              | 0.3112                              | 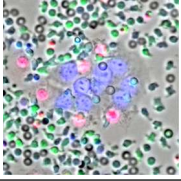 |
| mcf7_nuc_stardist_transfer | Hoechst                              | StarDist | SD_versatile_fluo | 0.3112                              |  |

**Table S3** Primary NK segmentation models. The models have been trained on a dataset of annotated primary NKs in ADCC images (*primary\_NKs\_w.MCF7*).

| Name              | Channels                       | Type     | Pretrained | Spatial calib. ( $\mu\text{m}$ ) | sample image                                                                        |
|-------------------|--------------------------------|----------|------------|----------------------------------|-------------------------------------------------------------------------------------|
| primNK_multimodal | Brightfield<br>CFSE<br>Hoechst | Cellpose | None       | 0.2178                           | 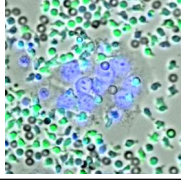 |
| primNK_cfse       | CFSE<br>None                   | Cellpose | CP_cyto2   | 0.2178                           |  |
| lymphocytes_ricm  | RICM                           | Cellpose | None       | 0.2                              |  |

**Table S4** Event detection models. We trained the following 1D DL models to classify and regress events of interest. The mean event response, centred at the event time, is shown for each channel in the pattern column.

| Name                 | Signals       | Task              | Pattern                                                                            |
|----------------------|---------------|-------------------|------------------------------------------------------------------------------------|
| <i>lysis.H.PI</i>    | Hoechst<br>PI | Strong PI intake  | 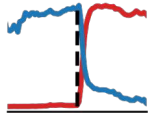 |
| <i>lysis.PI.area</i> | PI<br>area    | Strong PI intake  |  |
| <i>NucCond</i>       | area          | Nucleus shrinking |  |
